# Supplementary material
Source: PubMed Central journal article supplement (PMC3867200)
Supplement: NIHMS536567-supplement-1.pdf [file NIHMS536567-supplement-1.pdf]

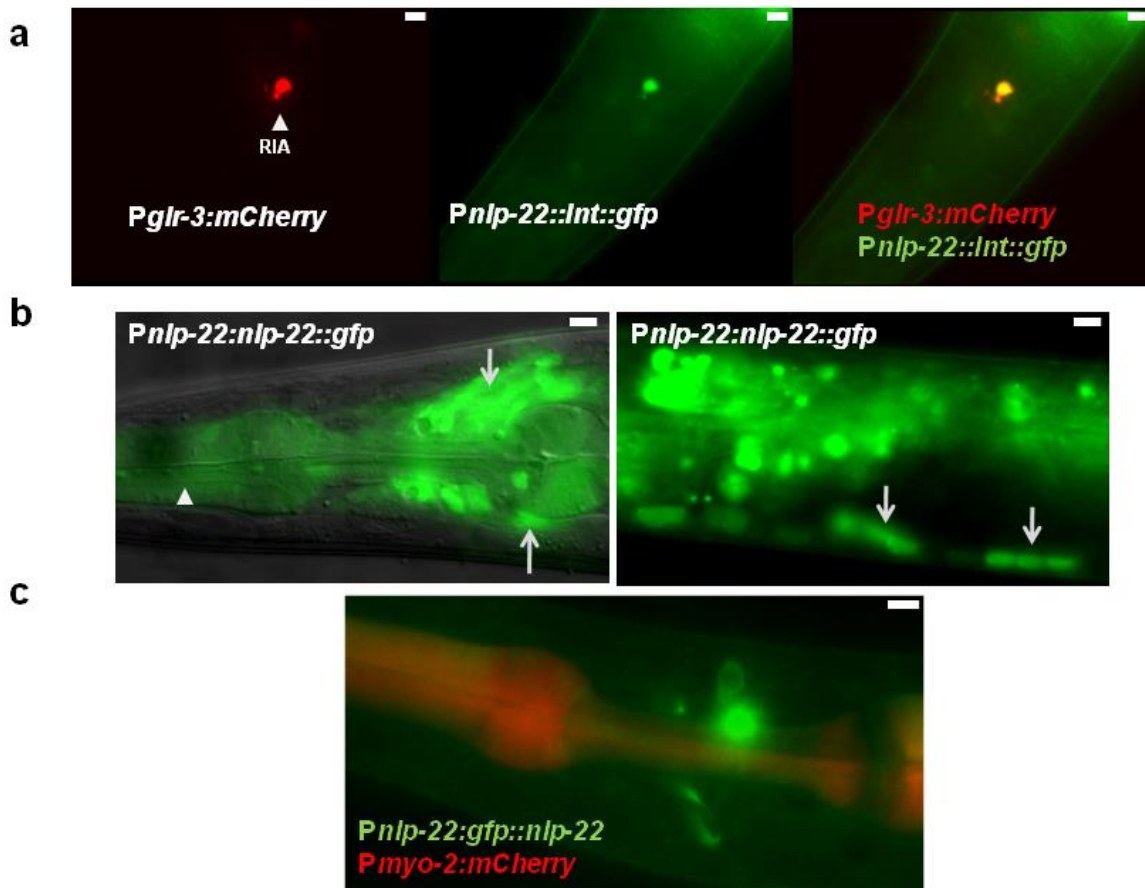

**SUPPLEMENTARY FIGURE S1:** *nlp-22* is expressed in the RIA interneurons and is secreted. (a) An animal expressing both the RIA specific reporter *Pglr-3:mCherry* (red) and *Pnlp-22:gfp* (green) shows co-localization in the RIA neurons (yellow). Only one of the pair of the RIA neurons is shown in this focal plane. (b) A Translational reporter in which *gfp* coding sequence replaces the *nlp-22* stop codon shows GFP spread to other neurons in the head (arrows, left panel), and in the ventral nerve cord (arrows, right panel). Anterior is to the left. Bright mCherry fluorescence in the pharynx, which was used as a marker for transgenesis, shows a signal in the *gfp* channel (arrow head). (c) A translational reporter in which *gfp* coding sequence was placed at the N-terminus of the NLP protein prior to the signal sequence shows GFP concentrated at the perimeter of the RIA neurons, suggesting that the GFP is interfering with secretion, and now marks the RIA plasma membranes. The transgenic animal is also marked with a red pharynx. Scale Bars = 5 $\mu$ M.

a

*C. elegans* NLP-22 KK-SIAI-**GRA**--GFRP-G  
*H. sapien* NMS KKDHTATWGR**PFFLFR**PRNG

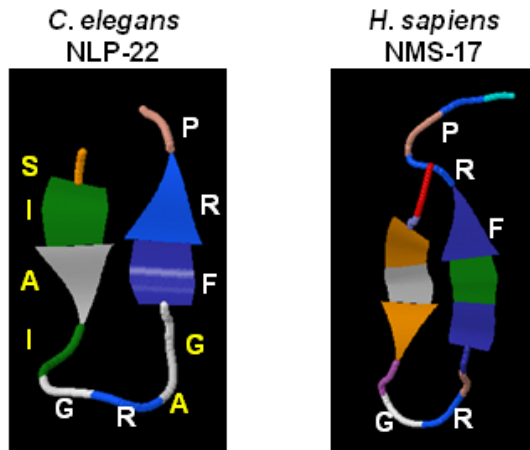

b

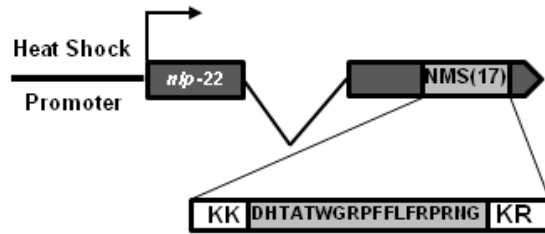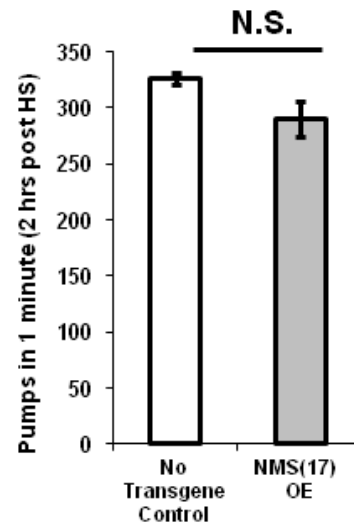

**SUPPLEMENTARY FIGURE S2:** Over-expression of Neuromedin S (17-33) does not induce behavioral quiescence. a) NLP-22 and human NMS-17, which consists of the last 17 amino acids of the full length NMS, are similar at the primary amino acid (top) and structural (bottom) levels. The conserved GR dipeptide and FRP tripeptide motifs are shown in white. b) Over-expression of NMS-17 in the context of the *C. elegans* *nlp-22* preproprotein using an inducible heat-shock promoter does not result in an inhibition of pharyngeal pumping (Student's two-tailed *t*-Test; Error bars represent s.e.m,  $N \geq 20$ ).

| Strain | Genotype                | Array                                                                                | Pumps per 20 Sec | N  |
|--------|-------------------------|--------------------------------------------------------------------------------------|------------------|----|
| N2     | WT                      | -                                                                                    | 88.4 ± 5.8       | 20 |
| TJ375  | WT                      | <b>gpls1</b> [ <i>Phsp-16.2:gfp</i> ]                                                | 91.3 ± 5.84      | 20 |
| NQ216  | <i>unc-119(ed3)</i>     | <b>qnEx95</b> [ <i>Phsp-16.2:nlp-22;Pmyo-2:mCherry, unc-119(+)</i> ]                 | 8.4 ± 10.77      | 40 |
| NQ251  | WT                      | <b>qnls142</b> [ <i>Phsp-16.2:nlp-22;Phsp-16.2:gfp; Pmyo-2:mCherry; unc-119(+)</i> ] | 6.2 ± 10.38      | 37 |
| NQ670  | WT                      | <b>qnEx95</b> [ <i>Phsp-16.2:nlp-22;Pmyo-2:mCherry; unc-119(+)</i> ]                 | 12.8 ± 19.0      | 20 |
| DA509  | <i>unc-31(e928)IV</i>   | -                                                                                    | 54.1 ± 5.4       | 15 |
| NQ256  | <i>unc-31(e928)IV</i>   | <b>qnEx95</b>                                                                        | 1.8 ± 4.9*       | 25 |
| KP1873 | <i>egl-3(nu349)V</i>    | -                                                                                    | 41.3 ± 24.9      | 32 |
| NQ319  | <i>egl-3(nu349)V</i>    | <b>qnEx95</b>                                                                        | 8.5 ± 11.3*      | 24 |
| KP2018 | <i>egl-21(n476)IV</i>   | -                                                                                    | 58.6 ± 18.0      | 18 |
| NQ320  | <i>egl-21(n476)IV</i>   | <b>qnEx95</b>                                                                        | 4.4 ± 5.8*       | 36 |
| MT1074 | <i>egl-4(n479)IV</i>    | -                                                                                    | 71.0 ± 8.5       | 23 |
| NQ321  | <i>egl-4(n479)IV</i>    | <b>qnEx95</b>                                                                        | 12.9 ± 14.0*     | 32 |
| NQ668  | <i>egl-4(n479)IV</i>    | <b>qnls142</b>                                                                       | 14.2 ± 10.2*     | 30 |
| IB16   | <i>ceh-17(np1)I</i>     | -                                                                                    | 62.1 ± 6.4       | 10 |
| NQ230  | <i>ceh-17(np1)I</i>     | <b>qnEx95</b>                                                                        | 6.6 ± 9.8*       | 10 |
| KG532  | <i>kin-2(ce179)X</i>    | -                                                                                    | 101.2 ± 13.6     | 15 |
| NQ605  | <i>kin-2(ce179)X</i>    | <b>qnls142</b>                                                                       | 45.1 ± 23.1*     | 25 |
| NQ667  | <i>kin-2(ce179)X</i>    | <b>qnEx95</b>                                                                        | 24.8 ± 12.8*     | 20 |
| RB1288 | <i>nmur-1(ok1387)X</i>  | -                                                                                    | 73.1 ± 10.8      | 10 |
| NQ274  | <i>nmur-1(ok1387)X</i>  | <b>qnEx95</b>                                                                        | 13.2 ± 12.9*     | 10 |
| RB2526 | <i>nmur-2(ok3502)II</i> | -                                                                                    | 58.1 ± 21.3      | 10 |
| NQ285  | <i>nmur-2(ok3502)II</i> | <b>qnEx95</b>                                                                        | 13.6 ± 19.5*     | 20 |
| VC1974 | <i>nmur-3(ok2295)X</i>  | -                                                                                    | 70.3 ± 6.6       | 10 |
| NQ275  | <i>nmur-3(ok2295)X</i>  | <b>qnEx95</b>                                                                        | 4.4 ± 5.4*       | 10 |
| RB1284 | <i>nmur-4(ok1381)I</i>  | -                                                                                    | 76 ± 3.3         | 7  |
| NQ235  | <i>nmur-4(ok1381)I</i>  | <b>qnEx95</b>                                                                        | 3.1 ± 6.5*       | 7  |

**Supplementary Table S1:** *nlp-22* over-expression analyses. *nlp-22* over-expression reduces pharyngeal

pumping rates in all genetic backgrounds tested, including those previously implicated in regulating quiescence and those implicated in processing some neuropeptides. Shown are the average pumping rates with standard deviations. \* $P < .005$ , 2-tailed Wilcoxon Rank Sum test, comparing the mutant over-expressing *nlp-22* to mutant alone.

| Strain | Genotype                 | Transgene Array                                                       | Total Quiescence (min)   | Peak Fraction Quiescence | L4 lethargus Duration (min) | End of L3L to Start of L4L (hr) | N  |
|--------|--------------------------|-----------------------------------------------------------------------|--------------------------|--------------------------|-----------------------------|---------------------------------|----|
| N2     | WT                       | -                                                                     | 91.3 ± 7.5               | 0.79 ± 0.03              | 190.3 ± 26.3                | 10.54 ± 0.27 <sup>^</sup>       | 10 |
| NQ596  | <i>nlp-22(gk509904)X</i> | -                                                                     | 55.3 ± 5.4 <sup>**</sup> | 0.67 ± 0.04 <sup>*</sup> | 139.5 ± 29.6 <sup>**</sup>  | 10.74 ± 0.72 <sup>^</sup>       | 10 |
| NQ596  | <i>nlp-22(gk509904)X</i> | -                                                                     | 49.3 ± 5.5               | 0.57 ± 0.04              | 141.9 ± 21.7                | -                               | 11 |
| NQ603  | <i>nlp-22(gk509904)X</i> | <b>qnEx311[<i>nlp-22(+)</i>;myo:Cherry;unc-119(+)]</b>                | 81.3 ± 9.0 <sup>**</sup> | 0.68 ± 0.05              | 246.1 ± 16.1 <sup>**</sup>  | -                               | 11 |
| NQ305  | <i>sid-1(pk3321)V</i>    | <b>qnls137[<i>dpy-7:nlp-22(RNAi)</i>;myo-2&gt;mCherry;unc-119(+)]</b> | 100.3 ± 9.2              | 0.82 ± 0.03              | 205.1 ± 37.6                | -                               | 11 |
| NQ376  | <i>sid-1(pk3321)V</i>    | <b>qnls157[<i>glr-3:nlp-22(RNAi)</i>;myo-2:mCherry;unc-119(+)]</b>    | 61.5 ± 5.4 <sup>**</sup> | 0.67 ± 0.15 <sup>*</sup> | 163.6 ± 34.9 <sup>*</sup>   | -                               | 11 |
| NQ156  | <i>lin-15(n765ts)X</i>   | <b>qnEx48[Pins-4:gfp;lin-15(+)]</b>                                   | 101.2 ± 9.9              | 0.78 ± 0.06              | 220.9 ± 16.4                | -                               | 9  |
| VM1345 | <i>lin-15(n765ts)X</i>   | <b>(2 RIAs DEAD) akEx211[Pglr-3:gfp;Pglr-3:ICE;lin-15(+)]</b>         | 62.4 ± 8.9 <sup>**</sup> | 0.66 ± 0.06 <sup>*</sup> | 192.2 ± 17.2 <sup>*</sup>   | -                               | 9  |
| NQ156  | <i>lin-15(n765ts)X</i>   | <b>qnEx48[Pins-4:gfp;lin-15(+)]</b>                                   | 114.4 ± 14.7             | 0.86 ± 0.03              | 229.2 ± 11.7                | -                               | 6  |
| VM1345 | <i>lin-15(n765ts)X</i>   | <b>(1 RIA DEAD) akEx211[Pglr-3:gfp;Pglr-3:ICE;lin-15(+)]</b>          | 96.7 ± 9.7 <sup>*</sup>  | 0.83 ± 0.05              | 198.5 ± 26.2                | -                               | 6  |

**Supplementary Table S2:** Quiescence measurements. (Student's two-tailed *t*-Test. <sup>\*\*</sup>*p*<0.005; <sup>\*</sup>*p*<0.05) Data is from 8 worms only since 2 of the 10 worms were monitored starting only in L4 larval stage. Total quiescence and peak fraction quiescence measurements shown are the average ± standard error of the mean. Lethargus duration and duration between L3 and L4 lethargus measurements are the average ± standard deviation. Measurements were made in a paired fashion. Therefore, there are two rows describing *nlp-22(gk509904)* data, one paired with simultaneously recorded wild-type data and one paired with simultaneously recorded data from *nlp-22(gk509904)*; qnEx311. Data from paired experiments is listed in consecutive rows shaded in the same color (gray or white). The strain NQ156, which was used as a *lin-15* transgenic control for VM1345, carries a transgene array with a GFP reporter expressed in a small set of neurons.

| Oligo Name                                                                                                             | Description                                        | Sequence                                              |
|------------------------------------------------------------------------------------------------------------------------|----------------------------------------------------|-------------------------------------------------------|
| <b><i>Phsp-16.2:nlp-22</i></b>                                                                                         |                                                    |                                                       |
| oNQ366                                                                                                                 | For- <i>nlp-22</i> - Adds Heat Shock Promoter tail | CTTCGAAAATCCTCATCGGATCCATGCGTTCCATAATCGTC             |
| oNQ367                                                                                                                 | Rev - Past 3'UTR of <i>nlp-22</i>                  | GTGAAGTAGCGCCAGTG                                     |
| oNQ368                                                                                                                 | Nested to oNQ367                                   | AAGACATGGTTATGGCAC                                    |
| oNQ372                                                                                                                 | For - HSPr from Fire Vector pPD49.83               | GCCAAGCTTGCATGCCTG                                    |
| oNQ373                                                                                                                 | Nested to oNQ372                                   | CAGGTCGACTCTAGAGG                                     |
| oNQ374                                                                                                                 | Rev- HSPr from Fire Vector pPD49.83                | GGATCCGATGAGGATTTTC                                   |
| <b><i>Pnlp-22:nlp-22::gfp</i></b>                                                                                      |                                                    |                                                       |
| oNQ416                                                                                                                 | For - <i>nlp-22</i> promoter                       | TATCAGTCGTC AAGGATTCCG                                |
| oNQ417                                                                                                                 | Nested to oNQ416                                   | TCAATGCCATTTGCAGAGAG                                  |
| oNQ470                                                                                                                 | Rev - Before stop codon - Adds GFP tail            | AAAAGTTCTTCTCCTTTACTCATTACTCCGATTGGGAATCCAGTT         |
| oNQ471                                                                                                                 | For - GFP in pPD95.75 - Adds <i>nlp-22</i> tail    | AACTGGATCCCAATCGGAGTAATGAGTAAAGGAGAAGAAGACTTTT        |
| oNQ472                                                                                                                 | Rev - In <i>unc-54</i> 3'UTR in pPD95.75           | AAAAGAAGCTAAAAACAAAGAAATTA                            |
| oNQ473                                                                                                                 | Nested to oNQ472                                   | GAGAAGTTTTTTGATAATAACAAAAATAGG                        |
| <b>Mutated versions of <i>Phsp-16.2:nlp-22</i> (Each pair (646-720) was used with oNQ366 and oNQ367, respectively)</b> |                                                    |                                                       |
| oNQ541                                                                                                                 | For- Used with oNQ367                              | AAATCTTCAAACATAATCATGCAGACCTCAGCTCTTGGGCTTCAG         |
| oNQ646                                                                                                                 | Rev - Mutates KR to AA                             | CGTTGTTGCTGCCCTGGACGGAATCCGGCTCG                      |
| oNQ647                                                                                                                 | For - Mutates KR to AA                             | CAGGGGCAGCAACAACGGACGAACTAACTGGATT                    |
| oNQ711                                                                                                                 | For - FRPG to MRPG                                 | ATGCGTCCAGGGAAACGAACAACG                              |
| oNQ712                                                                                                                 | Rev - FRPG to MRPG                                 | TTGTTTCGTTTCCCTGGACGCATTCCGGCTCGCCCAATCGCAATC         |
| oNQ713                                                                                                                 | For - FRPG to FEFG                                 | TGGAACCAGGGAAACGAACAACGGAC                            |
| oNQ714                                                                                                                 | Rev - FRPG to FEFG                                 | GTTTCCCTGGTTGGAATCCGGCTCGCCCAATCGCA                   |
| oNQ715                                                                                                                 | For - FRPG to FREG                                 | CGTGAAGGGAAACGAACAACGGACGAA                           |
| oNQ716                                                                                                                 | Rev - FRPG to FREG                                 | GTTGTTTCGTTTCCCTTACGGAATCCGGCTCGCCCAAT                |
| oNQ717                                                                                                                 | For - FRPG to FRPE                                 | TCCAGAAAAACGAACAACGGACGAACTA                          |
| oNQ718                                                                                                                 | Rev - FRPG to FRPE                                 | CGTTGTTTCGTTTCTGGACGGAATCCGGCTCGCCC                   |
| <b><i>Pnlp-22:gfp::nlp-22</i></b>                                                                                      |                                                    |                                                       |
| oNQ556                                                                                                                 | For - GFP in pPD95.75 - Used with oNQ559           | TTTCCCAACTCGGAAATGAGTAAAGGAGAAGAAGACTT                |
| oNQ557                                                                                                                 | Rev - <i>nlp-22</i> promoter - Used with oNQ416    | AAAAGTTCTTCTCCTTTACTCATTCCGAGTTGGGAAAGTTTCGAG         |
| oNQ558                                                                                                                 | For - <i>nlp-22</i> - Used with oNQ367             | ATGGCATGGATGAACTATACAAAATGCGTTCCATAATCGTCTTC          |
| oNQ559                                                                                                                 | Rev - GFP (before stop)                            | ATGAAGACGATTATGGAACGCATTTTGTATAGTTCATCCATGCC          |
| <b><i>Pglr-3:nlp-22(RNAi)</i></b>                                                                                      |                                                    |                                                       |
| oNQ533                                                                                                                 | For - <i>nlp-22</i> coding sequence for RNAi       | TTAGCTTTACACAATGTTAAAGGAAAA                           |
| oNQ534                                                                                                                 | Rev - <i>nlp-22</i> coding sequence for RNAi       | AACAATTAACATCAGAAAATTCATACT                           |
| oNQ535                                                                                                                 | Rev - Nested to oNQ534 for sense - with 616        | ATTAACATCAGAAAATTCATACTCCG                            |
| oNQ536                                                                                                                 | Rev - Nested to oNQ534 for anti - with 616         | GCTTTACACAATGTTAAAGGAAAAG                             |
| oNQ615                                                                                                                 | For - <i>glr-3</i> promoter                        | CTTCAATCTTCAAAAAAGGGCATT                              |
| oNQ616                                                                                                                 | Nested to 615                                      | CTTCAAAAAAGGGCATTAAAAACAGT                            |
| oNQ641                                                                                                                 | Rev - <i>glr-3</i> promoter - Adds sense tail      | TTTTCTTTAACATTGTGTAAGCTAAAATCCAGAACATATGTTAATAGCAAA   |
| oNQ642                                                                                                                 | Rev - <i>glr-3</i> promoter - Adds antisense tail  | AGTATGAATTTTCTGATGTTAATTGTTAATCCAGAACATATGTTAATAGCAAA |
| <b><i>Pglr-3:mCherry</i></b>                                                                                           |                                                    |                                                       |

|                                          |                                                             |                                                               |
|------------------------------------------|-------------------------------------------------------------|---------------------------------------------------------------|
| oNQ856                                   | Rev - <i>glr-3</i> promoter - used with 615                 | GAAAAGTTCTTCTCCTTTACTCATAATCGCAATCGACTTTTTTCATGAT             |
| oNQ857                                   | For - mCherry from pCFJ90 - used with 472                   | CTTTTTTGTACAAACTTGTCATGAACATATGTTAATAGCAAATATT                |
| <b><i>Pdpy-7:nlp-22(RNAi)</i></b>        |                                                             |                                                               |
| oNQ567                                   | For - <i>dpy-7</i> promoter                                 | CAGCAGCGGTAACGGAGACAT                                         |
| oNQ568                                   | Nested to 567                                               | GGTAACGGAGACATCAGTGACCT                                       |
| oNQ569                                   | Rev - <i>dpy-7</i> promoter - Adds sense tail               | TTTTCTTTAACATTGTGTAAGCTAATTATCTGGAACAAAATGTAAGAATA            |
| oNQ570                                   | Rev - <i>dpy-7</i> promoter - Adds antisense tail           | AGTATGAATTTTCTGATGTTAATTGTTTTATCTGGAACAAAATGTAAGAATA          |
| <b><i>Pnlp-22(w/Intron):gfp</i></b>      |                                                             |                                                               |
| oNQ648                                   | Rev - GFP - Adds <i>nlp-22</i> intron tail - with 557       | TTGTGTAAGCTAACGTGTCTTGTAGTTCCCGTCAT                           |
| oNQ649                                   | For - Intron <i>nlp-22</i> -Adds <i>gfp</i> tail - with 650 | GGGAACAACAAGACACGTTAGCTTTACACAATGTTA                          |
| oNQ650                                   | Rev - intron <i>nlp-22</i> -Adds <i>gfp</i> tail            | ACCTGAAATTACGGTGCTTGTG                                        |
| oNQ651                                   | For - GFP - Adds <i>nlp-22</i> intron tail - with 472       | ACCGTAATTTTCAGGTGCTGAAGTCAAGTTTGAAG                           |
| <b><i>Pglr-3:ChannelRhodopsin-2</i></b>  |                                                             |                                                               |
| oNQ617                                   | Rev - <i>glr-3</i> promoter ChR2 tail - with 615            | CAGGGCGCCTCCATAATCCATAATCCAGAACATATGTTAATAGCAAA               |
| oNQ618                                   | For - ChR2 <i>glr-3</i> tail - with 472                     | AATATTTGCTATTAACATATGTTCTGGATTATGGATTATGGAGGCGCCCTG           |
| <b>Sequencing <i>gk509904</i></b>        |                                                             |                                                               |
| oNQ552                                   | Forward                                                     | GGATTGACGATCTTCGCGTTG                                         |
| oNQ534                                   | Reverse                                                     | AACAATTAACATCAGAAAATTCATACT                                   |
| <b><i>Pfsp-16.2:Human NMS(17-33)</i></b> |                                                             |                                                               |
| oNQ1167                                  | Rev - engineers NMS(17-33) in <i>nlp-22</i> - with 366      | AAGGAAGAATGGGCGTCCCCAGGTGGCGGTGTGGTCCTTTTTTCATGATTGGAAGGGTTCG |
| oNQ1168                                  | For - engineers NMS(17-33) in <i>nlp22</i> - with 367       | ACCTGGGGACGCCATTCTTCCTTTTCCGCCACGTAACGGGAAACGAACAACGGACGAA    |
| <b><i>nlp-22</i> qPCR</b>                |                                                             |                                                               |
| Probe                                    |                                                             | /56-FAM/AAGCGCCCC/ZEN/TCACGAGTGT/3IABkFQ/                     |
| Primer 1                                 |                                                             | ATCCTTCACCGAGCAAACACTAC                                       |
| Primer 2                                 |                                                             | ATGATTGGAAGGGTTCGGAG                                          |

**Supplementary Table S3:** Oligonucleotides used in this study. DNA constructs were made using overlap-extension PCR<sup>48</sup>. Mutated versions of *nlp-22* were made by PCR and then TOPO© cloned into a pCR™2.1-TOPO® TA Vector (Invitrogen™). They were sequenced to verify that the intended mutation was successfully introduced and that no additional mutations were introduced.
